# Supplementary material for: Improved calibration of the Green–Ampt infiltration module in the EROSION-2D/3D model using a rainfall-runoff experiment database
Source: Copernicus journal article supplement (doi:10.5194/soil-7-241-2021), 2021-06-18
Supplement: Supplementary file 1 [file soil-7-241-2021-supplement.zip]

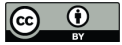

## *Supplement of*

# **Improved calibration of the Green–Ampt infiltration module in the EROSION-2D/3D model using a rainfall-runoff experiment database**

**Hana Beitlerová et al.**

*Correspondence to:* Hana Beitlerová (beitlerova.hana@seznam.cz)

- soil-7-241-2021-supplement-title-page.pdf
- supplement
  - aMC\_in\_R.R
  - allforPO.Rdata
  - avisualization\_paper.R
  - example.Rdata
  - experiments.csv
  - skin.Rmd
  - validation
    - \* input
    - \* model

The copyright of individual parts of the supplement might differ from the article licence.
